# Supplementary material
Source: PubMed Central journal article supplement (PMC4528772)
Supplement: supp_pp.15.00934_PP2015-00934D_Supplemental_Material_1fig1.pdf [file supp_pp.15.00934_PP2015-00934D_Supplemental_Material_1fig1.pdf]

**Perduns et al. (2015) - Supplement**

**Supplemental figure S1:** Read mapping statistics of ChIP-Seq and RNA-Seq libraries and comparison of RNA-Seq data from this study with data from Li et al., 2010.

**A**

| RNA-Seq | Processed reads | Uniquely mapped reads | % (Uniquely mapped) |
|---------|-----------------|-----------------------|---------------------|
| Base A  | 59,346,263      | 46,246,282            | 78%                 |
| Base B  | 33,432,364      | 24,687,777            | 74%                 |
| Blade A | 74,724,999      | 53,086,298            | 71%                 |
| Blade B | 27,582,965      | 18,668,247            | 68%                 |

| H3K9ac-ChIP | Processed reads | Uniquely mapped reads | % (Uniquely mapped) |
|-------------|-----------------|-----------------------|---------------------|
| Base A      | 29,553,783      | 23,724,782            | 80%                 |
| Base B      | 18,884,476      | 15,417,201            | 82%                 |
| Blade A     | 30,611,609      | 23,999,153            | 78%                 |
| Blade B     | 24,498,527      | 19,320,849            | 79%                 |

| H3K4me3-ChIP | Processed reads | Uniquely mapped reads | % (Uniquely mapped) |
|--------------|-----------------|-----------------------|---------------------|
| Base A       | 13,877,095      | 7,718,604             | 56%                 |
| Base B       | 7,915,293       | 6,624,821             | 84%                 |
| Blade A      | 16,204,778      | 10,212,086            | 63%                 |
| Blade B      | 25,950,063      | 21,664,983            | 83%                 |

**B**

| Base              | Base A | Base B | Li et al., Base A | Li et al., Base B |
|-------------------|--------|--------|-------------------|-------------------|
| Base A            |        | 0.9    | 0.94              | 0.89              |
| Base B            | 0.9    |        | 0.9               | 0.93              |
| Li et al., Base A | 0.94   | 0.9    |                   | 0.95              |
| Li et al., Base B | 0.89   | 0.93   | 0.95              |                   |

| Blade              | Blade A | Blade B | Li et al., Blade A | Li et al., Blade B |
|--------------------|---------|---------|--------------------|--------------------|
| Blade A            |         | 0.93    | 0.96               | 0.96               |
| Blade B            | 0.93    |         | 0.92               | 0.93               |
| Li et al., Blade A | 0.96    | 0.92    |                    | 1                  |
| Li et al., Blade B | 0.96    | 0.93    | 1                  |                    |

**Figure S1:** Read mapping statistics of ChIP- and RNA-Seq libraries and comparison of RNA-Seq data from this study with data from Li et al., 2010. **A** Summary of processed reads and mapping statistics of ChIP- and RNA-Seq libraries for all replicates and samples. **B** Pearson correlation coefficients between analogous fragments from Li et al. (2010) and this study.
